# Identification of the amino acid region involved in the intercellular interaction between the $\beta_1$ subunits of $\text{Na}^+/\text{K}^+$ -ATPase

Elmira Tokhtaeva<sup>1</sup>, George Sachs<sup>1</sup>, Haiying Sun<sup>2</sup>, Laura A. Dada<sup>2</sup>, Jacob I. Sznajder<sup>2</sup> and Olga Vagin<sup>1,\*</sup>

<sup>1</sup>Department of Physiology, School of Medicine, UCLA and Veterans Administration Greater Los Angeles Health Care System, Los Angeles, VAGLAHS/West LA, Building 113, Room 324, 11301 Wilshire Boulevard, Los Angeles, CA 90073, USA

<sup>2</sup>Division of Pulmonary and Critical Care Medicine, Feinberg School of Medicine, Northwestern University, 240 E. Huron, McGaw Pavilion M-300 Chicago, IL 60611, USA

\*Author for correspondence (olgav@ucla.edu)

Accepted 28 October 2011

Journal of Cell Science 125, 1605–1616

© 2012. Published by The Company of Biologists Ltd

doi: 10.1242/jcs.100149

## Summary

Epithelial junctions depend on intercellular interactions between  $\beta_1$  subunits of the  $\text{Na}^+/\text{K}^+$ -ATPase molecules of neighboring cells. The interaction between dog and rat subunits is less effective than the interaction between two dog  $\beta_1$  subunits, indicating the importance of species-specific regions for  $\beta_1$ - $\beta_1$  binding. To identify these regions, the species-specific amino acid residues were mapped on a high-resolution structure of the  $\text{Na}^+/\text{K}^+$ -ATPase  $\beta_1$  subunit to select those exposed towards the  $\beta_1$  subunit of the neighboring cell. These exposed residues were mutated in both dog and rat YFP-linked  $\beta_1$  subunits (YFP- $\beta_1$ ) and also in the secreted extracellular domain of the dog  $\beta_1$  subunit. Five rat-like mutations in the amino acid region spanning residues 198–207 of the dog YFP- $\beta_1$  expressed in Madin–Darby canine kidney (MDCK) cells decreased co-precipitation of the endogenous dog  $\beta_1$  subunit with YFP- $\beta_1$  to the level observed between dog  $\beta_1$  and rat YFP- $\beta_1$ . In parallel, these mutations impaired the recognition of YFP- $\beta_1$  by the dog-specific antibody that inhibits cell adhesion between MDCK cells. Accordingly, dog-like mutations in rat YFP- $\beta_1$  increased both the (YFP- $\beta_1$ )- $\beta_1$  interaction in MDCK cells and recognition by the antibody. Conversely, rat-like mutations in the secreted extracellular domain of the dog  $\beta_1$  subunit increased its interaction with rat YFP- $\beta_1$  in vitro. In addition, these mutations resulted in a reduction of intercellular adhesion between rat lung epithelial cells following addition of the secreted extracellular domain of the dog  $\beta_1$  subunit to a cell suspension. Therefore, the amino acid region 198–207 is crucial for both trans-dimerization of the  $\text{Na}^+/\text{K}^+$ -ATPase  $\beta_1$  subunits and cell–cell adhesion.

**Key words:**  $\text{Na}^+/\text{K}^+$ -ATPase  $\beta_1$  subunit, Epithelial junction, Trans-dimerization

## Introduction

The  $\text{Na}^+/\text{K}^+$ -ATPase (also known as the Na,K-ATPase or sodium/potassium-transporting ATPase) plays a crucial role in epithelial functions. Located in the basolateral membrane, it generates ion gradients that maintain the membrane potential and drive vectorial sodium-dependent transepithelial transport of various solutes. An effective function of the  $\text{Na}^+/\text{K}^+$ -ATPase in driving vectorial transepithelial transport is ensured by the presence of both tight junctions and adherens junctions. Tight junctions restrict paracellular diffusion of solutes and maintain the polar distribution of basolateral and apical membrane transporters (Steed et al., 2010). Adherens junctions are crucial for the initiation and stabilization of intercellular contacts and are required for the formation and maintenance of the tight junctions (Baum and Georgiou, 2011; Gumbiner, 2005; Irie et al., 2004).

Tight and adherens junctions have a common structural organization that comprises cell adhesion molecules and cytosolic anchoring proteins (Hartsock and Nelson, 2008). Cell adhesion molecules embedded in apposed membranes undergo the trans (cell-to-cell) dimerization by means of the interactions between their extracellular domains, whereas anchoring proteins link cytoplasmic domains of cell adhesion molecules to the

cytoskeleton and initiate various signaling pathways (Hartsock and Nelson, 2008; Miyoshi and Takai, 2005; Steed et al., 2010).

E-cadherin is a major cell adhesion molecule of adherens junctions in epithelial cells (Shapiro and Weis, 2009). Homotypic trans-dimerization of E-cadherin is crucial for initiation of cell–cell contact, whereas homotypic cis-dimerization is required for stabilization of adherens junctions (Wu et al., 2010). In addition to E-cadherin, another class of transmembrane proteins, nectins, have been recently identified as cell adhesion molecules in adherens junctions (Miyoshi and Takai, 2007; Takai et al., 2003). Nectins are thought to initiate cell–cell contact by forming hetero-trans dimers even before E-cadherin dimerization, which is then elaborated by nectin-facilitated cadherin recruitment. Nectin and E-cadherin are physically associated with each other through their cytoplasmic-domain-associated proteins (Sakisaka et al., 2007).

Recent data have shown that the  $\text{Na}^+/\text{K}^+$ -ATPase also acts as a cell adhesion molecule in adherens junctions. The cytoplasmic domain of the  $\text{Na}^+/\text{K}^+$ -ATPase is linked to the cytoplasmic domain of E-cadherin via an ankyrin and spectrin cytoskeleton (Kizhatil et al., 2007; Nelson et al., 1990; Nelson and Veshnock, 1987), whereas the extracellular domain of the  $\text{Na}^+/\text{K}^+$ -ATPase

$\beta_1$  subunit interacts with the  $\beta_1$  subunit of the apposed cell (Padilla-Benavides et al., 2010; Tokhtaeva et al., 2011). The removal of N-glycans from the  $\text{Na}^+/\text{K}^+$ -ATPase  $\beta_1$  subunit or alteration of the amino acid sequence of one of the interacting  $\beta_1$  subunits by ‘swapping species’ weakens  $\beta_1$ - $\beta_1$  binding (Tokhtaeva et al., 2011), indicating that both N-glycans and particular amino acids are important for binding. The impairment of  $\beta_1$ - $\beta_1$  binding, in turn, decreases the detergent resistance of junctional proteins and increases paracellular permeability. Conversely, improvement of  $\beta_1$ - $\beta_1$  binding by reduction of N-glycan branching with specific inhibitors improves  $\beta_1$ - $\beta_1$  interaction and decreases both extractability of junctional proteins and paracellular permeability (Tokhtaeva et al., 2011; Vagin et al., 2008). Therefore, interactions between the  $\text{Na}^+/\text{K}^+$ -ATPase  $\beta_1$  subunits are important for the integrity of intercellular junctions.

Here, by using site-directed mutagenesis of species-specific residues in the extracellular domains of YFP-linked dog and rat  $\beta_1$  subunits (YFP- $\beta_1$ ), as well as in the secreted extracellular domain of the dog  $\beta_1$  subunit (Sec-dog  $\beta_1$ ), we found that the amino acid region 198–207 exposed towards the neighboring cell in cell monolayers is crucial for homotypic intercellular interactions between the  $\text{Na}^+/\text{K}^+$ -ATPase  $\beta_1$  subunits.

## Results

### Rat-like mutations in the amino acid region 198–207 of the YFP-dog- $\beta_1$ impair its interaction with the endogenous dog $\beta_1$ subunit in MDCK cells

Stable cell lines of MDCK cells expressing either dog or rat YFP- $\beta_1$  have both YFP-linked and endogenous  $\beta_1$  subunits (Fig. 1A). The endogenous  $\beta_1$  subunits of MDCK cells, which are of dog origin, react with M17-P5-F11 monoclonal antibodies raised against sheep  $\beta_1$  subunits and with 464.8 monoclonal antibodies raised against rabbit  $\beta_1$  subunits (Fig. 1A). Accordingly, YFP-linked dog  $\beta_1$  subunits also react with both M17-P5-F11 and 464.8 antibodies (Fig. 1A). By contrast, YFP-rat- $\beta_1$  is not recognized by M17-P5-F11 or 464.8 antibodies against  $\beta_1$  (Fig. 1A). As expected, antibodies against YFP react with both dog and rat YFP- $\beta_1$  but not with endogenous  $\beta_1$  subunits (Fig. 1A). The epitope for the M17-P5-F11 antibody, L<sup>196</sup>ETYP (Fig. 1B), has been identified by screening a bacteriophage epitope library (Sun and Ball, 1994). However, the L<sup>196</sup>ETYP regions are present in both rat and sheep  $\beta_1$  subunits, but rat and sheep sequences differ from each other immediately downstream of the L<sup>196</sup>ETYP region. The lack of reactivity of the M17-P5-F11 antibody with the rat  $\beta_1$  subunit indicates that the epitope for the M17-P5-F11 antibody extends

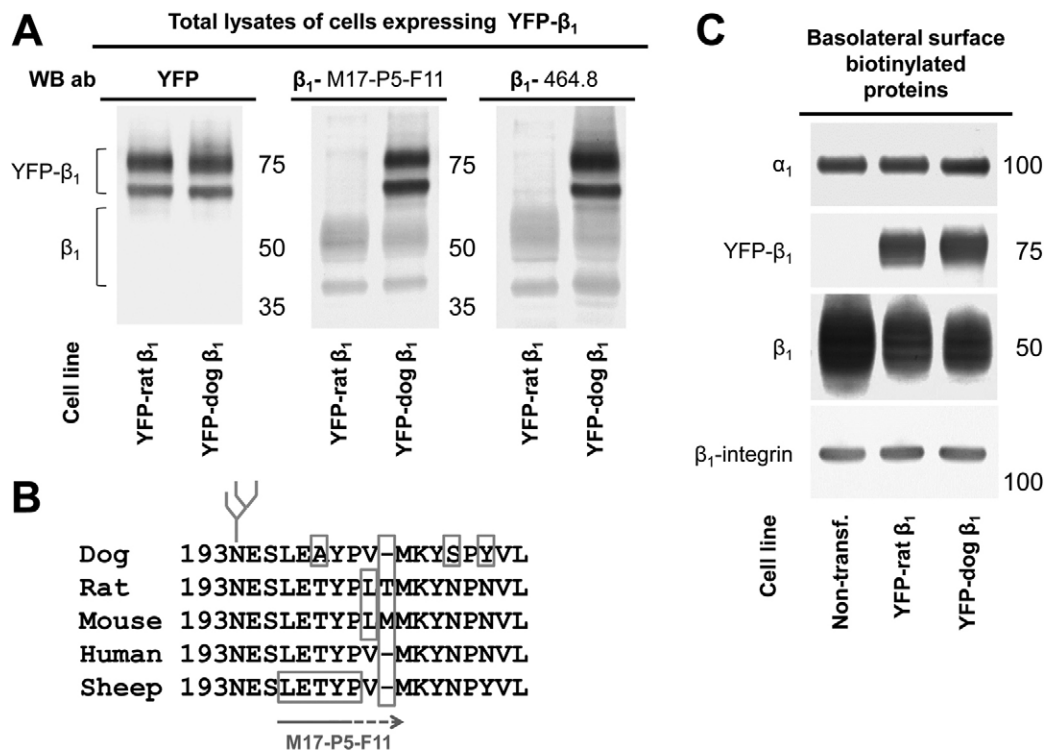

**Fig. 1.** The monoclonal antibodies raised against the rabbit or sheep  $\beta_1$  subunit react with YFP-dog- $\beta_1$  but not with YFP-rat- $\beta_1$ . (A) Western blot analysis of total lysates of MDCK cells expressing either YFP-dog- $\beta_1$  or YFP-rat- $\beta_1$  using antibodies against YFP and two types of monoclonal antibodies to  $\beta_1$ . Both 464.8 and M17-P5-F11 anti- $\beta_1$  antibodies, raised against rabbit and sheep subunits, respectively, react with the endogenous  $\beta_1$  subunit and YFP-dog- $\beta_1$  but do not react with YFP-rat- $\beta_1$ . Antibodies to YFP react both with YFP-dog- $\beta_1$  and with YFP-rat- $\beta_1$ . (B) Multi-species sequence alignment of the region containing the epitope of M17-P5-F11 antibody as deduced from screening a bacteriophage epitope library (Sun and Ball, 1994). The epitope of the 464.1 antibody is unknown. (C) Western blot of proteins isolated by basolateral surface-selective biotinylation showing the presence of both rat and YFP-dog- $\beta_1$  fusion proteins in the basolateral membranes. Expression of either YFP-dog- $\beta_1$  or YFP-rat- $\beta_1$  in MDCK cells resulted in a substantial decrease in the amount of the endogenous  $\text{Na}^+/\text{K}^+$ -ATPase  $\beta_1$  subunits in the basolateral membranes but did not change the level of the  $\alpha_1$  subunits in comparison with that of non-transfected ('Non-transf.') cells.  $\beta_1$ -integrin was used as a loading control.

beyond the L<sup>196</sup>ETYP region, as shown by the arrow below the sequence alignment (Fig. 1B).

Both dog and rat YFP-β<sub>1</sub> were detected in the basolateral membrane by surface-specific basolateral biotinylation (Fig. 1C). The amount of the endogenous β<sub>1</sub> subunits in the basolateral membrane in both transfected cell lines was less than that in non-transfected cells, whereas the levels of the α<sub>1</sub> subunit were similar in all three cell lines (Fig. 1C). These results are consistent with previously published data showing that expressed YFP-β<sub>1</sub> competes with the endogenous Na<sup>+</sup>/K<sup>+</sup>-ATPase β<sub>1</sub> subunit for binding to the α<sub>1</sub> subunit in the endoplasmic reticulum (ER) and replaces a fraction of the endogenous α<sub>1</sub> subunits in the β<sub>1</sub>-β<sub>1</sub> complexes (Tokhtaeva et al., 2009). As only assembled Na<sup>+</sup>/K<sup>+</sup>-ATPase molecules are transported from the ER to the plasma membrane (Tokhtaeva et al., 2009), expression of either YFP-dog-β<sub>1</sub> or YFP-rat-β<sub>1</sub> results in a decrease of the amount of the endogenous β<sub>1</sub> subunit in the basolateral membrane (Fig. 1C).

The presence of both β<sub>1</sub>-(YFP-β<sub>1</sub>) and β<sub>1</sub>-β<sub>1</sub> in the basolateral membranes enables an assessment of β<sub>1</sub>-β<sub>1</sub> interactions by detecting the amount of the endogenous β<sub>1</sub> subunits that

co-immunoprecipitate with YFP-β<sub>1</sub>. Co-immunoprecipitation of the endogenous β<sub>1</sub> subunits was considerably more effective with YFP-dog-β<sub>1</sub> than with YFP-rat-β<sub>1</sub> (Tokhtaeva et al., 2011). As the number and positions of *N*-glycans are the same in dog and rat β<sub>1</sub> subunits, these results indicate that species-specific amino acid regions are important for β<sub>1</sub>-β<sub>1</sub> binding. To predict the putative β<sub>1</sub>-β<sub>1</sub> binding residues, the amino acid sequences of the dog and rat β<sub>1</sub> subunits were compared with each other and with the sequence of the chain B of the high-resolution structure of the Na<sup>+</sup>/K<sup>+</sup>-ATPase (Shinoda et al., 2009) (dogfish β<sub>1</sub> subunit) (Fig. 2). The amino acid sequences of cytoplasmic and transmembrane domains of dog and rat β<sub>1</sub> subunits are identical, whereas the extracellular domains contain 26 mismatches (Fig. 2A). The majority of these mismatched residues are conserved in dog and rat subunits (Fig. 2A, green font), but 11 residues are substantially different (Fig. 2A, red font). Mapping the residues that differ in rat and dog subunits on the high-resolution structure of the Na<sup>+</sup>/K<sup>+</sup>-ATPase (Shinoda et al., 2009) (Fig. 2B) identified the species-specific residues that are exposed on the surface of the β<sub>1</sub> subunit extracellular domain (Fig. 2A, residues marked by asterisks). Some of these residues,

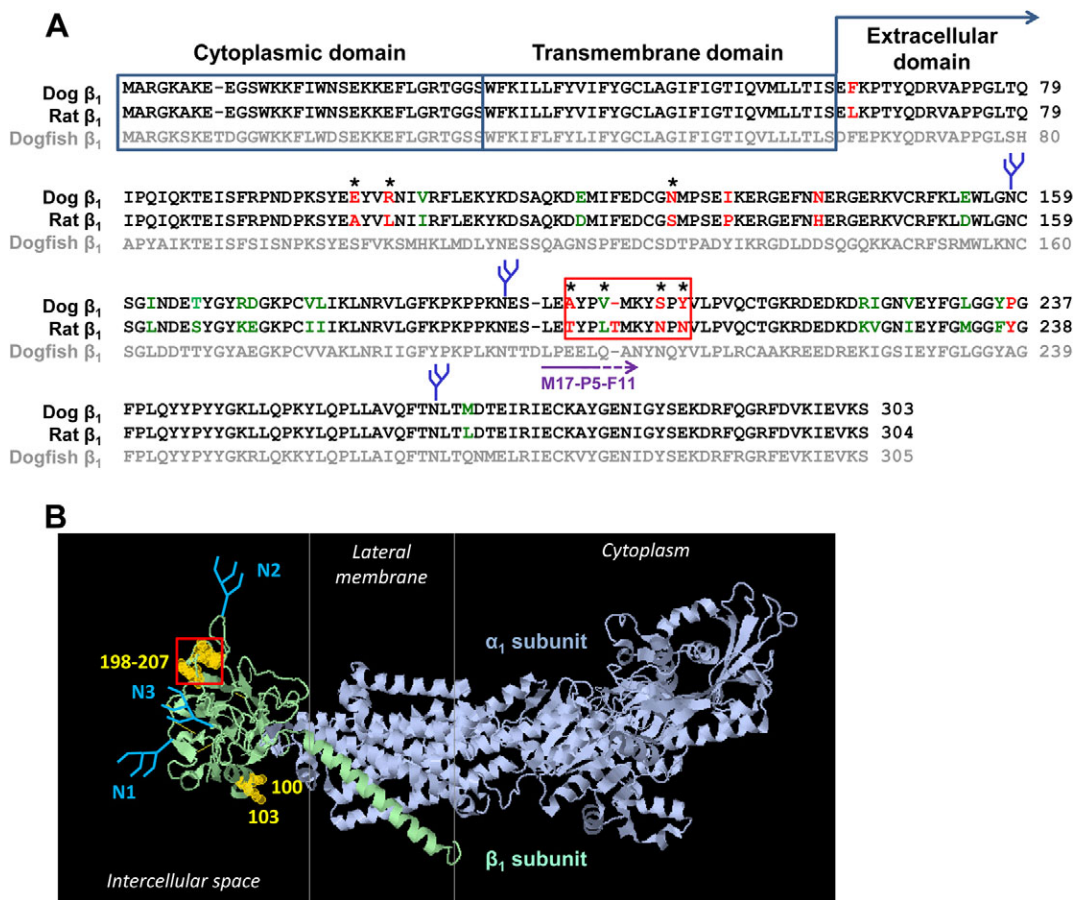

**Fig. 2. Prediction of putative β<sub>1</sub>-β<sub>1</sub> interacting amino acid residues.** (A) A computational alignment of amino acid sequences of the Na<sup>+</sup>/K<sup>+</sup>-ATPase dog β<sub>1</sub> subunit (NP\_001003283.1), rat β<sub>1</sub> subunit (NP\_037245.2) and chain B, crystal structure of the sodium-potassium pump (CAQ53919.1) was performed by using the Cobalt Multiple Alignment Tool. The amino acid residues that are identical in dog and rat subunits are shown in black font, similar amino acid residues are shown in green font, and different amino acid residues are shown in red font. The most variable region between the dog and rat sequences is highlighted by the red box. (B) The amino acid residues different in dog and rat sequences were mapped on a high-resolution structure of the Na<sup>+</sup>/K<sup>+</sup>-ATPase (2ZXE) (Shinoda et al., 2009) by using Jmol, version 1.45, to identify the species-specific residues exposed at the surface of the extracellular domain. These residues are indicated by asterisks in A and by yellow halos in B. *N*-glycans are shown in blue. The epitope of the M17-P5-F11 antibody is shown by a purple arrow in A.

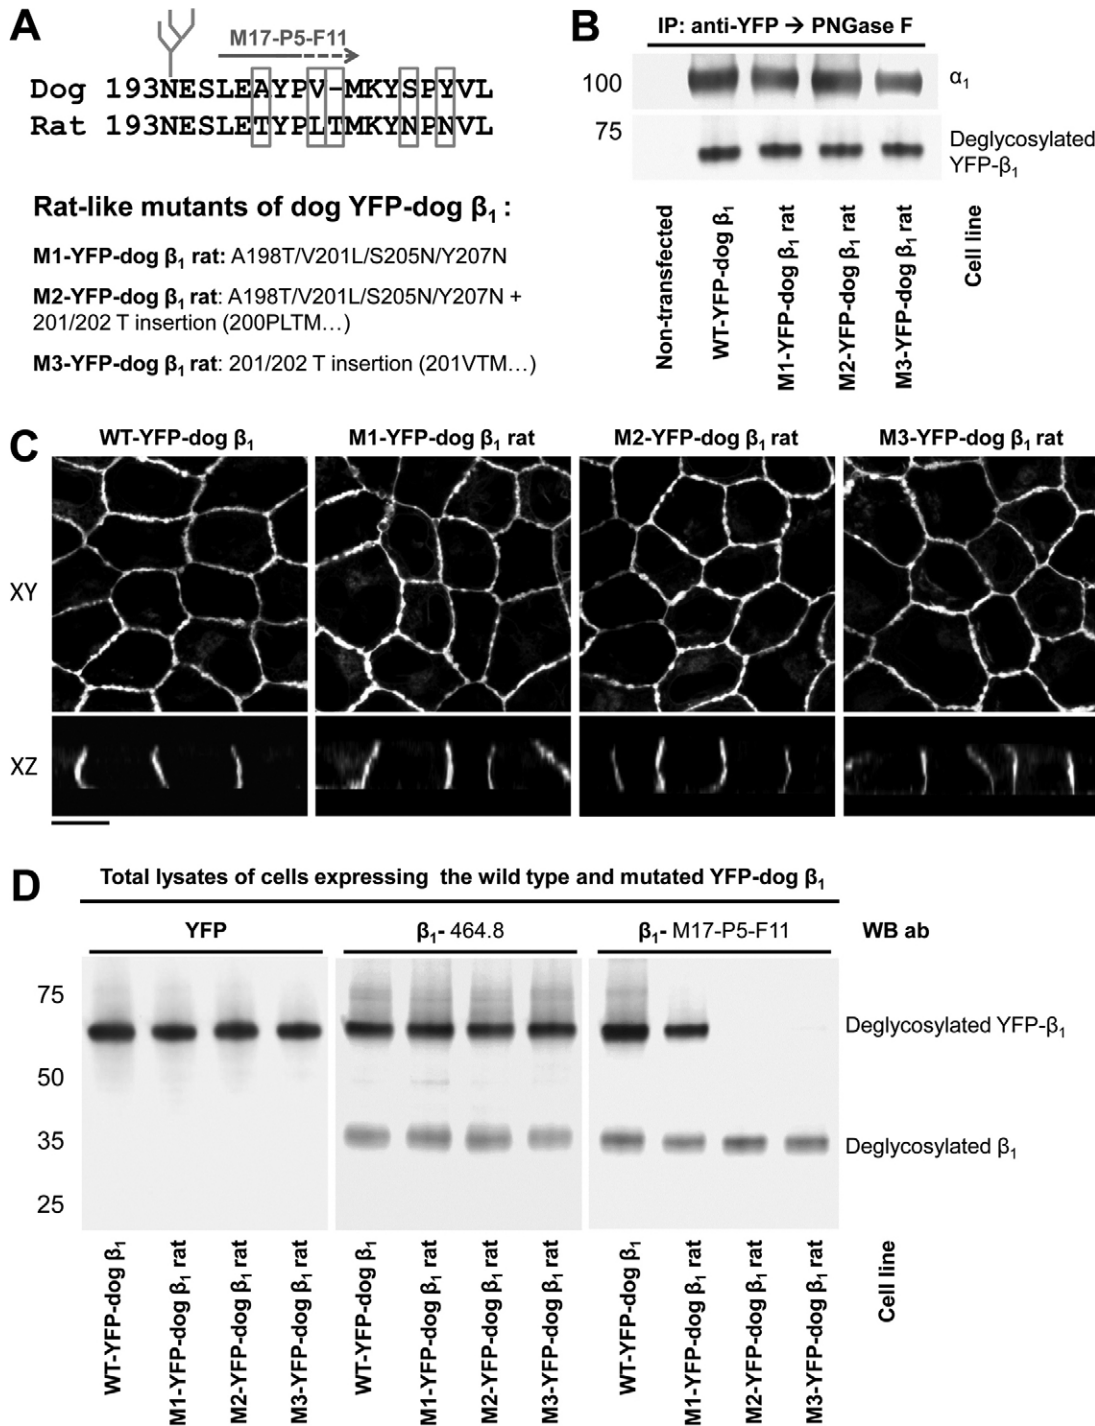

**Fig. 3. Rat-like mutations in the amino acid region 198–207 of YFP-dog- $\beta_1$  impair the recognition of YFP-dog- $\beta_1$  by an adhesion-blocking M17-P5-F11 antibody.** (A) The positions of the amino acid residues mutated in the amino acid region 198–207 of YFP-dog- $\beta_1$  are shown. Three mutants were constructed, the first with four rat-like amino acid substitutions, the second with four substitutions and one amino acid insertion, and the third with the amino acid insertion only. (B) Western blot analysis of the proteins precipitated by an antibody against YFP shows co-precipitation of the endogenous  $\alpha_1$  subunit with the wild-type and mutated YFP-dog- $\beta_1$  fusion proteins. (C) Confocal microscopy images of stable cell lines expressing the wild-type and mutated YFP-dog- $\beta_1$  fusion proteins show their predominant localization in the lateral membranes. All images were taken with the same settings. Scale bar: 10  $\mu$ m. (D) Equal amounts of total cell lysates of MDCK cells expressing either wild-type or mutated YFP-dog- $\beta_1$  were analyzed by immunoblotting using antibodies to YFP and two types of monoclonal antibodies to  $\beta_1$ . Mutations in the amino acid region 198–207 did not have an effect on the reactivity of the 464.1 anti- $\beta_1$  antibody with YFP-dog- $\beta_1$ . By contrast, replacement of four residues in the amino acid region 198–207 resulted in a substantial decrease in the reactivity of the M17-P5-F11 antibody with YFP-dog- $\beta_1$ . Insertion of a rat-unique Thr residue resulted in a complete loss of reactivity of the M17-P5-F11 antibody with YFP-dog- $\beta_1$ . Here and below, to enable quantitative comparison, immunoprecipitated proteins were deglycosylated by PNGase F prior to SDS-PAGE.



such as residues 100, 103 and 106, are located on the lateral surface of the extracellular domain (Fig. 2B) and hence cannot be involved in intercellular interactions between the  $\beta_1$  subunits of neighboring cells, but they could be involved in cis interactions. Other residues are exposed towards the neighboring cell and, therefore, can be considered as candidates for mediators of the trans interactions between the  $\beta_1$  subunits of apposed cells. Particularly, the region highlighted by the red box contains three residues that differ in dog and rat subunits and one residue that shows a conservative change in the dog and rat subunits (Fig. 2A). All these residues are exposed on the surface facing the neighboring cell (Fig. 2B). In addition, this region contains one residue (Thr) that is present in the rat subunit but not in the dog subunit (Fig. 2A).

To determine whether this region is important for  $\beta_1$ - $\beta_1$  binding, we replaced four residues in the amino acid region 198–207 of the YFP-dog- $\beta_1$  with those present in the rat subunit and also inserted the rat-unique Thr residue between Val201 and Met202 of the YFP-dog- $\beta_1$ . Three mutants of YFP-dog- $\beta_1$ , one containing four amino acid replacements, another containing four replacements and one insertion, and the other one containing an insertion only (Fig. 3A), were stably expressed in MDCK cells. Similar to the wild-type YFP-dog- $\beta_1$ , the mutated fusion proteins were associated with the endogenous  $\alpha_1$  subunit, as detected by co-immunoprecipitation and were located predominantly in the lateral membranes of MDCK cells, as demonstrated by confocal microscopy (Fig. 3B,C). The levels of expression of the

wild-type and mutated YFP- $\beta_1$  were similar, as detected by antibodies against YFP and by 464.8 antibodies against  $\beta_1$  (Fig. 3D, left and middle panel). In addition to YFP-linked subunits, all three cell lines expressed the endogenous  $\beta_1$  subunit, as detected by 464.8 or M17-P5-F11 antibodies (Fig. 3D, middle and right panels).

Remarkably, the four rat-like amino acid substitutions in the YFP-dog- $\beta_1$  resulted in a substantial decrease in its reactivity with the M17-P5-F11 antibody (Fig. 3D, right panel). The Thr insertion between the residues 201 and 202, either alone, or in combination with four rat-like substitutions resulted in a complete loss of the M17-P5-F11 antibody recognition, whereas the 464.8 antibody similarly recognized the wild-type and mutated YFP-dog- $\beta_1$  (Fig. 3D, middle and right panels). As the M17-P5-F11 antibody inhibits formation of intercellular junctions between MDCK cells (Vagin et al., 2006), the loss of its reactivity with the YFP-dog- $\beta_1$  due to mutations in the amino acid region 198–207 suggests a contribution of this region to adhesive interactions between dog  $\beta_1$  subunits of neighboring cells.

To directly evaluate the effect of mutations on  $\beta_1$ - $\beta_1$  interaction, the wild-type and mutated YFP- $\beta_1$  fusion proteins were immunoprecipitated using antibodies to YFP, and the amount of co-immunoprecipitated endogenous  $\beta_1$  subunits was determined by immunoblotting. The four rat-like replacements in the amino acid region 198–207 decreased the amount of co-immunoprecipitated  $\beta_1$  subunits by ~40% as detected by either

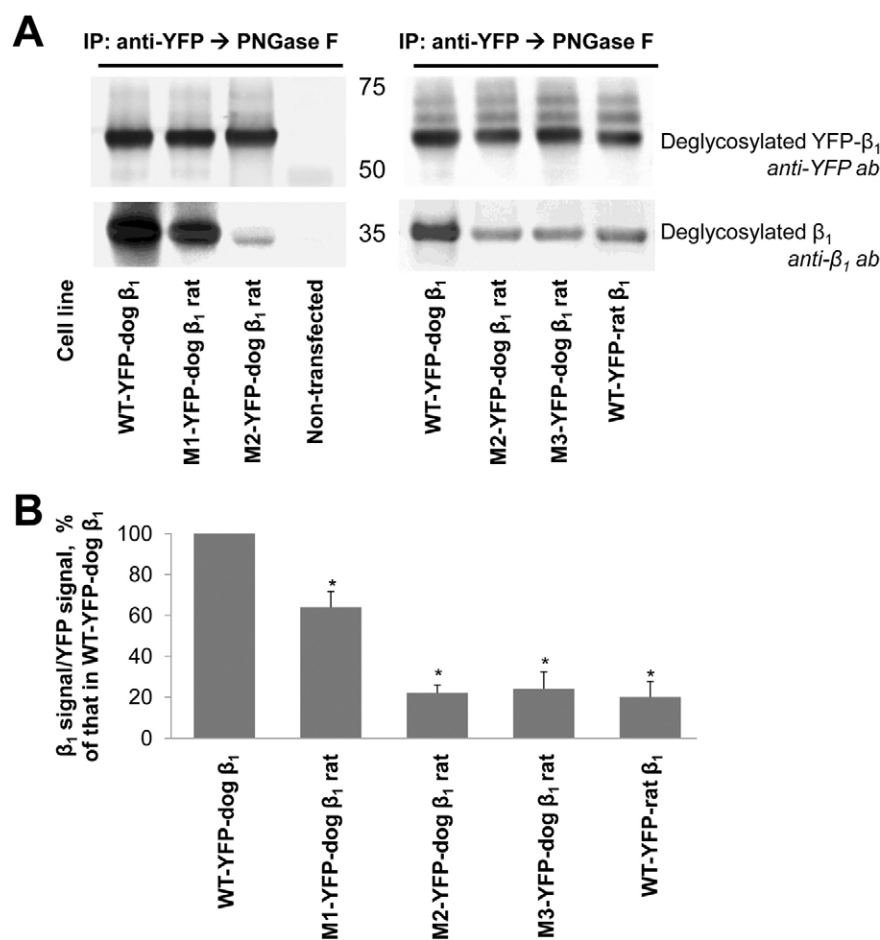

**Fig. 4. Rat-like mutations in the amino acid region 198–207 of the YFP-dog- $\beta_1$  impair (YFP- $\beta_1$ )- $\beta_1$  interactions.** (A) Western blot analysis using antibodies against YFP and Na<sup>+</sup>/K<sup>+</sup>-ATPase  $\beta_1$  shows that immunoprecipitation of YFP- $\beta_1$  resulted in co-precipitation of the endogenous Na<sup>+</sup>/K<sup>+</sup>-ATPase  $\beta_1$  subunits from cell lysates of MDCK cells expressing the wild-type YFP-dog- $\beta_1$ , or its mutants or the wild-type YFP-rat- $\beta_1$ . (B) Densitometric quantification of the results presented in A was performed by dividing a signal from the antibody to  $\beta_1$  by the corresponding signal from the antibody to YFP. The comparative bar graph shows these ratios as a percentage of the ratio obtained for the wild-type YFP- $\beta_1$ . The results of quantification indicate that amino acid substitutions and insertion in the amino acid region 198–207 decreased the amount of YFP- $\beta_1$ -co-immunoprecipitated endogenous  $\beta_1$  subunits. The positions of the amino acid residues mutated are shown in Fig. 3A. WT, wild-type; error bars,  $\pm$ s.d. ( $n=3$ ); \*, significant difference from the 'WT-YFP-dog- $\beta_1$ ',  $P<0.01$ , Student's  $t$ -test.

464.8 or M17-P5-F11 antibodies to  $\beta_1$  (Fig. 4A, left panel; and 4B). The results obtained with the 464.8 antibody are shown. The Thr insertion performed in addition to four rat-like amino acid replacements decreased the amount of co-immunoprecipitated  $\beta_1$  subunits by  $\sim 80\%$  in comparison with the wild-type control

(Fig. 4A, left panel; and 4B). To evaluate the contribution of a Thr insertion alone in the impairment of  $\beta_1$ - $\beta_1$  binding, a mutant with four rat-like replacements and Thr insertion was compared with the mutant with the Thr insertion alone. The amount of  $\beta_1$  subunit that co-precipitated with these two mutated YFP-dog- $\beta_1$

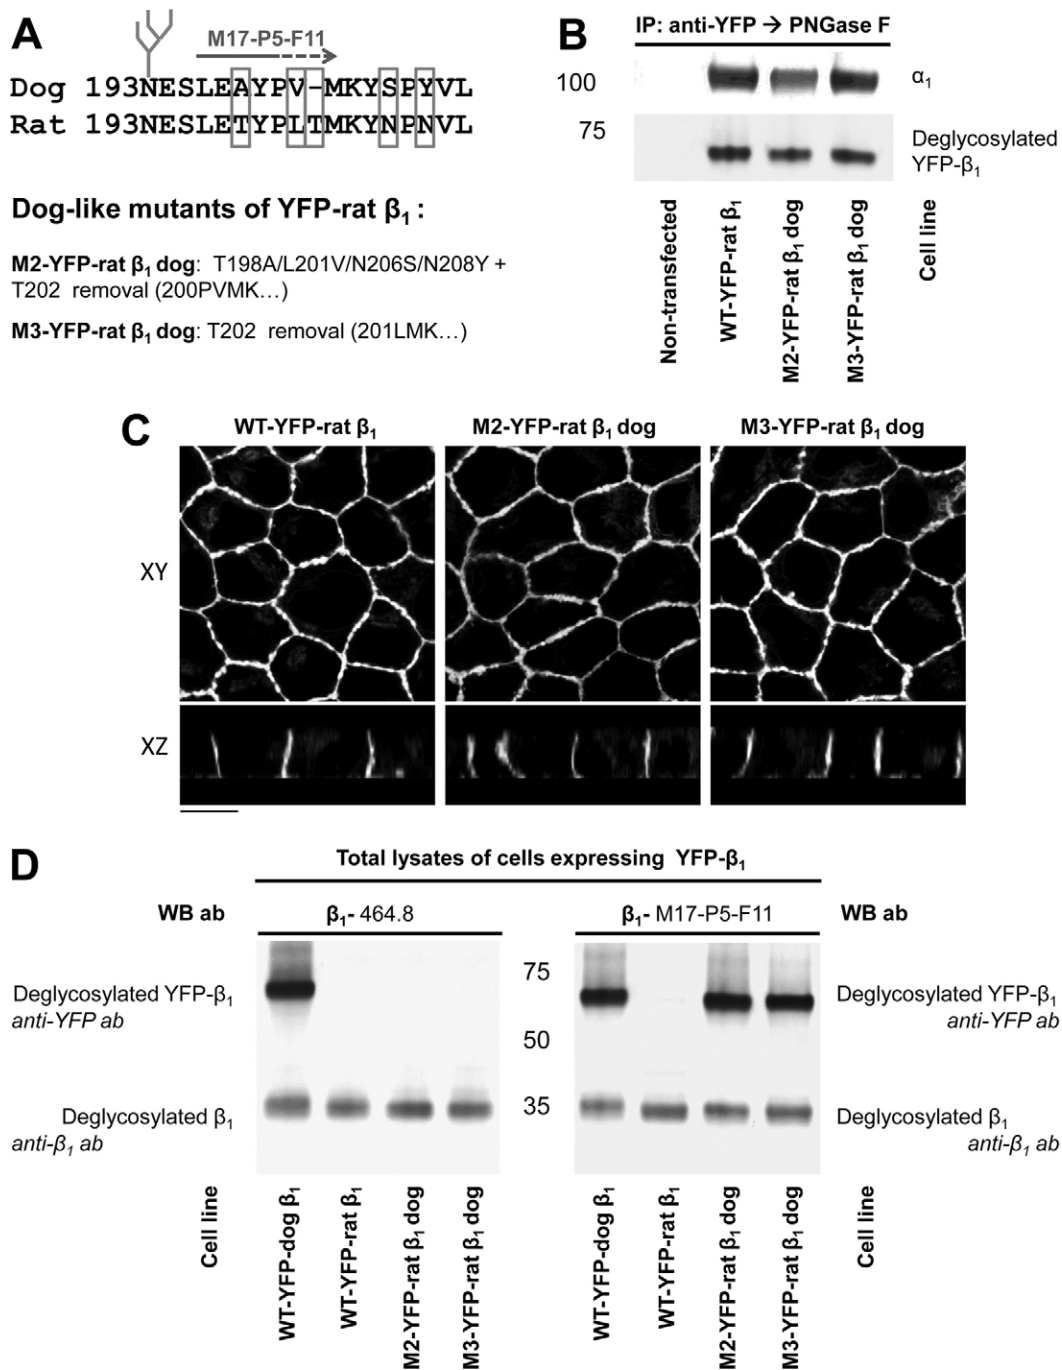

**Fig. 5. Dog-like mutations in the amino acid region 198–208 of YFP-rat- $\beta_1$  increase its reactivity with the M17-P5-F11 antibody.** (A) Positions of the amino acid residues mutated in the amino acid region 198–208 of YFP-rat- $\beta_1$  are shown. Two mutants were constructed, one with four substitutions and one amino acid insertion, and the other with an amino acid insertion only. (B) Western blot analysis of the proteins precipitated by an antibody to YFP shows co-precipitation of the endogenous  $\beta_1$  subunits with the wild-type and mutated YFP-dog- $\beta_1$  fusion proteins. (C) Confocal microscopy images of stable cell lines expressing the wild-type and mutated YFP-rat- $\beta_1$  fusion proteins show their predominant localization in the lateral membranes. All images were taken with the same settings. Scale bar: 10  $\mu\text{m}$ . (D) Western blot analysis using antibodies to YFP and  $\text{Na}^+/\text{K}^+$ -ATPase  $\beta_1$  shows co-precipitation of the endogenous  $\text{Na}^+/\text{K}^+$ -ATPase  $\beta_1$  subunits with the wild-type YFP-rat- $\beta_1$ , or its mutants or with the wild-type YFP-dog- $\beta_1$ .

fusion proteins was similar. Also, a similar level of co-immunoprecipitation of the endogenous  $\beta_1$  subunits was observed with the YFP-rat- $\beta_1$  (Fig. 4A, right panel and 4B). These results show the importance of the amino acid region 198–207 for the species-specific binding between two dog  $\beta_1$  subunits.

#### Dog-like mutations in the amino acid region 198–208 of the YFP-rat- $\beta_1$ improve its interaction with the endogenous $\beta_1$ subunit in MDCK cells

Two dog-like mutants of YFP-rat- $\beta_1$ , one with four amino acid replacements and Thr removal and the other one with just the Thr removed, were assembled with the  $\alpha_1$  subunit and were localized predominantly in the lateral membranes of MDCK cells (Fig. 5A–C). In contrast to the wild-type YFP-rat- $\beta_1$ , both dog-like mutants reacted with a cell-adhesion-blocking M17-P5-F11 antibody (Fig. 5D). The removal of T202 resulted in a 2.5-fold increase in the amount of YFP- $\beta_1$ -co-immunoprecipitated endogenous  $\beta_1$  subunit compared with that with the wild-type YFP-rat- $\beta_1$ , as detected by either 464.8 or M17-P5-F11 antibodies against  $\beta_1$  (Fig. 6A,B). The results obtained with 464.8 antibodies are shown. The T202 removal together with four dog-like replacements further increased co-immunoprecipitation of the endogenous  $\beta_1$  subunit up to the level observed with YFP-dog- $\beta_1$  (Fig. 6). These results confirm the importance of the amino acid region 198–207 for adhesive binding between dog  $\beta_1$  subunits.

#### Rat-like mutations in the amino acid region 198–207 of the secreted extracellular domain of the dog $\beta_1$ subunit increase its interaction with the rat $\beta_1$ subunit

The results presented above indicate that the 198–207 region is important for binding between two dog  $\beta_1$  subunits. To determine whether the same region mediates the interaction between two rat

$\beta_1$  subunits, we expressed the secreted extracellular domain of the dog  $\beta_1$  subunit (Sec-dog  $\beta_1$ ) and studied the effect of rat-like mutations in its region 198–207 on the interaction of Sec-dog  $\beta_1$  with the rat  $\beta_1$  subunit by using two approaches. First, we assessed the in vitro binding between the YFP-rat- $\beta_1$  and the wild-type or mutated Sec-dog  $\beta_1$ . Second, we looked at the effects of the wild-type and mutated Sec-dog  $\beta_1$  on aggregation between rat lung epithelial (RLE-6TN) cells.

To express Sec-dog  $\beta_1$ , human embryonic kidney (HEK-293) cells were transiently transfected with the construct, which was generated in the Fambrough laboratory and was used previously to express the secreted extracellular domain of the dog  $\beta_1$  subunit in CHO cells (Padilla-Benavides et al., 2010). This construct encodes for the chimera containing a cytoplasmic and a transmembrane domain of dipeptidyl peptidase 4 (DPPIV) and an extracellular domain of the dog Na<sup>+</sup>/K<sup>+</sup>-ATPase  $\beta_1$  subunit. Western blot analysis of the culture media of transfected cells using the 464.8 antibody against  $\beta_1$  detected a secreted protein of molecular mass ~45 kDa (Fig. 7A), similar to the results reported for CHO cells (Padilla-Benavides et al., 2010). Deglycosylation of this protein by peptide-N-glycosidase F (PNGase F) yielded a core protein of molecular mass ~28 kDa (Fig. 7A), which corresponds to the predicted molecular mass of the deglycosylated extracellular domain of the  $\beta_1$  subunit. The protein detected in the cell lysate moved faster on SDS-PAGE than a secreted protein. However, its deglycosylated product had the same electrophoretic mobility as the deglycosylated protein in the media (Fig. 7A), indicating that the intracellular form is an immature fraction of a secreted extracellular domain of the  $\beta_1$  subunit. Similar results were obtained by using M17-P5-F11 antibodies against  $\beta_1$ , which in addition reacted with the endogenous  $\beta_1$  subunit of HEK-293 cells (data not shown). The results indicate that the chimeric protein is inserted in the ER

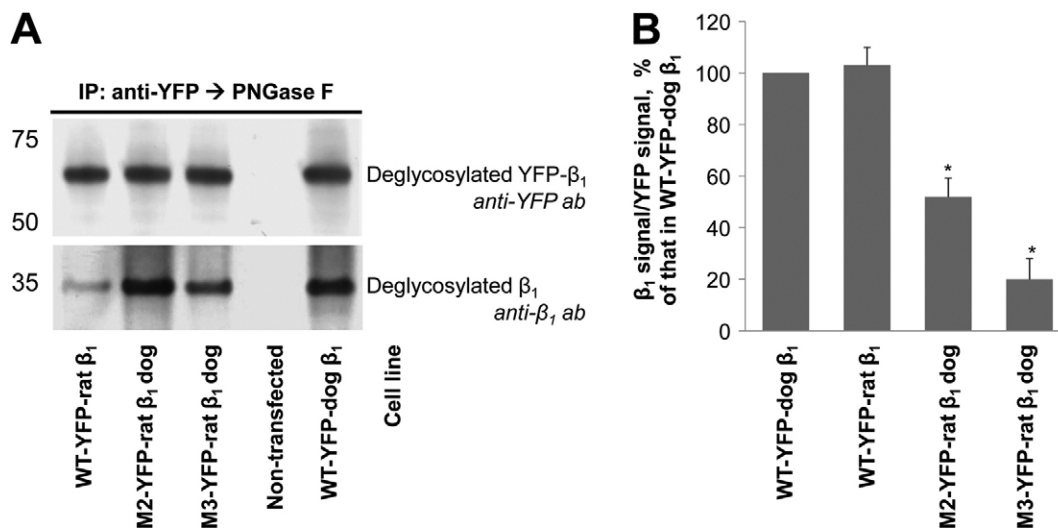

**Fig. 6.** Dog-like mutations in the amino acid region 198–208 of YFP-rat- $\beta_1$  increase (YFP- $\beta_1$ )- $\beta_1$  interactions. (A) Western blot analysis using two anti- $\beta_1$  antibodies of total lysates of cells expressing the wild-type YFP-dog- $\beta_1$ , or the wild-type YFP-rat- $\beta_1$ , or mutated YFP-rat- $\beta_1$ . Mutations in the amino acid sequence 198–208 of YFP-rat- $\beta_1$  resulted in recognition of YFP-rat- $\beta_1$  by the anti- $\beta_1$  M17-P5-F11, but not by the anti- $\beta_1$  464.8, antibody. (B) Densitometric quantification of the results presented in A, which was performed as described in the legend to Fig. 4, shows that the dog-like insertion and substitutions in the amino acid region 198–208 increased the amount of YFP-rat- $\beta_1$ -co-immunoprecipitated endogenous  $\beta_1$  subunits. WT, wild-type; error bars,  $\pm$ s.d. ( $n=3$ ); \*, significant difference from the ‘WT-dog’,  $P<0.01$ , Student’s  $t$ -test.

membrane as a type II transmembrane protein (N-terminus in cytoplasm and C-terminus in the ER lumen), allowing co-translational addition of *N*-glycans to the extracellular domain of

the  $\beta_1$  subunit, followed by cleavage of this domain by signal peptidase(s) in the ER lumen and secretion of the  $\beta_1$  extracellular domain into the media.

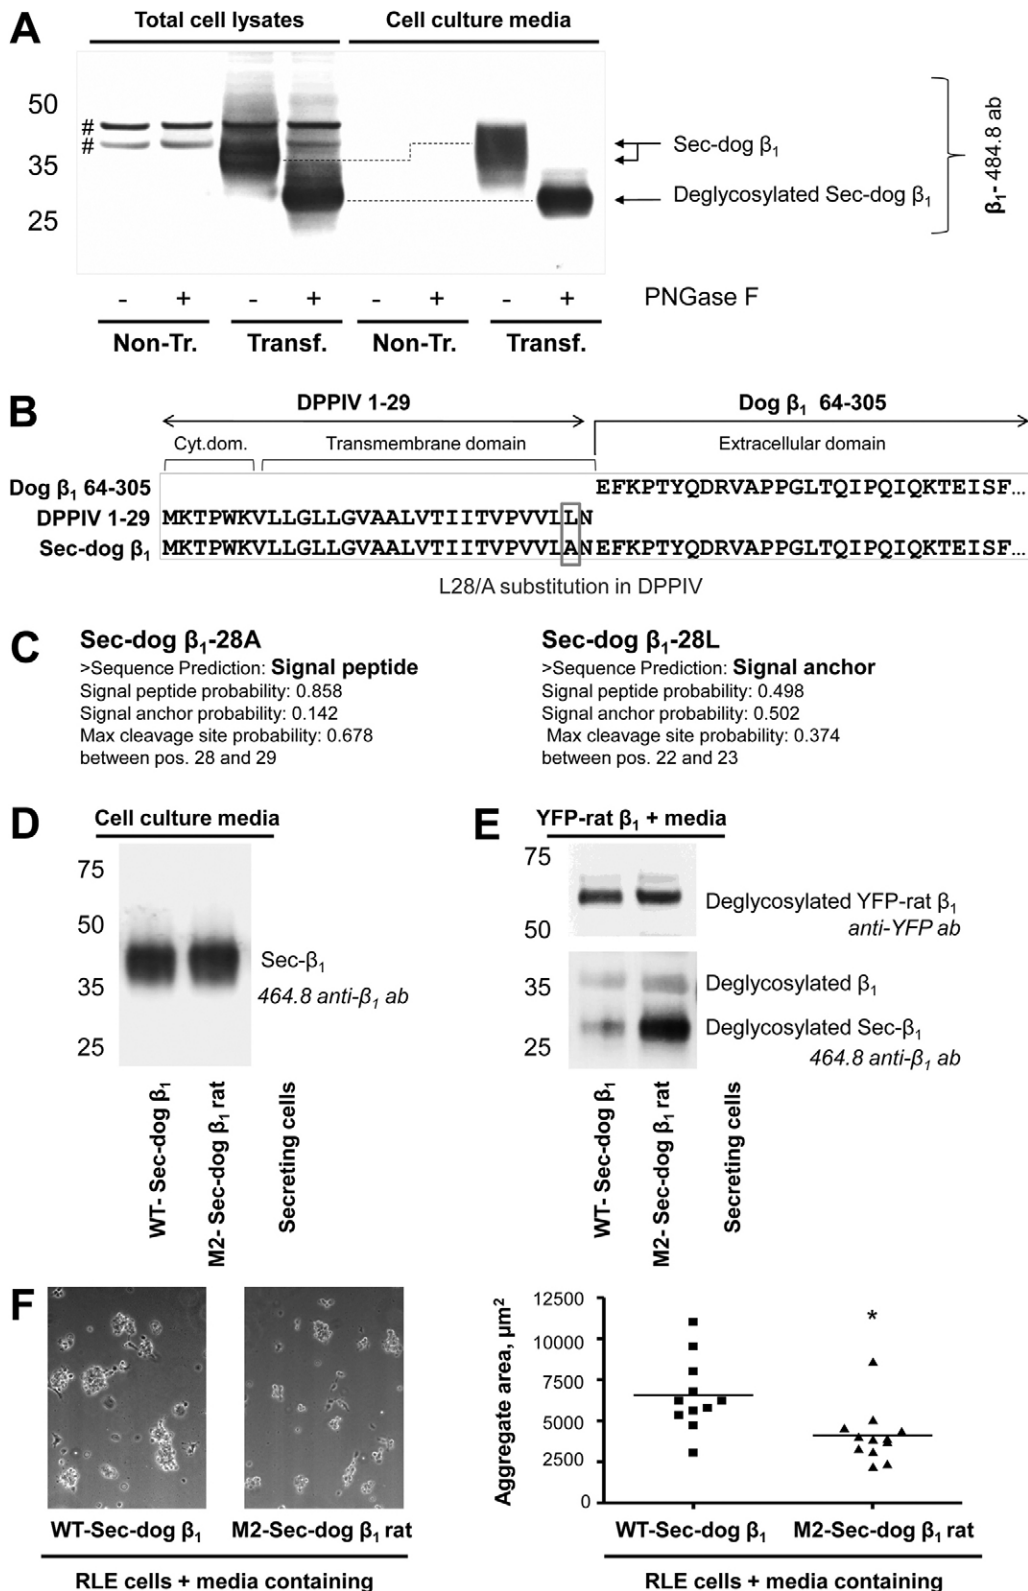

Fig. 7. See next page for legend.



Even though our results on secretion of the extracellular domain of the dog β<sub>1</sub> subunit were consistent with previously published data (Padilla-Benavides et al., 2010), it was not clear to us why a chimera between two type II transmembrane proteins, DPPIV and β<sub>1</sub> subunit, produced a secreted protein (Fig. 7A). Moreover, a similar chimera between DPPIV and chicken β<sub>1</sub> subunit has been reported as a transmembrane protein (Hamrick et al., 1993), which makes the results showing secretion of the dog β<sub>1</sub> subunit extracellular domain even more puzzling. DNA sequencing of the construct DPPIV-dog-β<sub>1</sub> showed a mutation resulting in a single amino acid substitution, L28A, in the DPPIV sequence (Fig. 7B). Running the program SignalP 3.0 (Bendtsen et al., 2004) predicted the presence of a cleavable signal peptide in the Sec-dog β<sub>1</sub> containing 28Ala, but not in the Sec-dog β<sub>1</sub> containing 28Leu (Fig. 7C). Thus, secretion of the extracellular domain of the dog β<sub>1</sub> subunit appears to be due to the generation of a signal peptidase cleavage site by the single L28A amino acid substitution in a DPPIV-dog-β<sub>1</sub> chimera.

As for the wild-type, the mutant Sec-dog β<sub>1</sub> with four rat-like amino acid replacements and one amino acid insertion in the region 198–207 was secreted into the cell culture media (Fig. 7D), as detected by the 464.8 antibody against β<sub>1</sub>. The M17-P5-F11 antibody did not recognize this rat-like mutant of Sec-dog β<sub>1</sub>. To determine whether these rat-like mutations increase the interaction of Sec-dog β<sub>1</sub> with the rat β<sub>1</sub> subunit in vitro, YFP-rat-β<sub>1</sub> expressed in MDCK cells was immunoprecipitated using antibodies to YFP. After extensive washing, the YFP-rat-β<sub>1</sub> attached to protein-A in agarose beads

**Fig. 7. Rat-like mutations in the secreted extracellular domain of the dog β<sub>1</sub> subunit improve its binding to the rat Na<sup>+</sup>/K<sup>+</sup>-ATPase β<sub>1</sub> subunit.**

(A) Western blot analysis of cell lysates of HEK293 cells, either non-transfected or transiently transfected with a vector encoding a chimera between rat DPPIV and dog Na<sup>+</sup>/K<sup>+</sup>-ATPase β<sub>1</sub> subunit (Sec-dog β<sub>1</sub>), as well as corresponding cell culture media. The 464.8 antibody against β<sub>1</sub> detected proteins in both the cell lysates and media of transfected, but not of non-transfected, cells. Treatment by PNGase F of both cell lysates and media resulted in the formation of a product of ~28 kDa, which corresponds to the predicted molecular mass of the de-glycosylated extracellular domain of the β<sub>1</sub> subunit. #, non-specific bands. (B) Sequence analysis of the construct encoding the chimera showing an L28A amino acid substitution in a DPPIV sequence. (C) The results of signal peptide prediction using SignalP 3.0 (Bendtsen et al., 2004) for Sec-dog β<sub>1</sub>, containing either Ala or Leu at position 28. (D) Rat-like mutations were introduced into Sec-dog β<sub>1</sub> at the positions identical to those introduced in M2-YFP-dog-β<sub>1</sub> rat shown in Fig. 3A. Both wild-type and mutated Sec-dog β<sub>1</sub> were secreted to the media during transient expression in HEK-293 cells, as detected by immunoblotting. (E) The YFP-linked rat β<sub>1</sub> subunit expressed in MDCK cells was immunoprecipitated on anti-YFP antibody bound to protein A in agarose beads. The beads with adherent YFP-rat-β<sub>1</sub> were then incubated with the media containing either the wild-type or mutated Sec-dog β<sub>1</sub> followed by eluting bead-adherent proteins, SDS-PAGE and immunoblotting. Rat-like mutations in the region 198–207 of Sec-dog β<sub>1</sub> considerably increased its co-precipitation with YFP-rat-β<sub>1</sub>. (F) A suspension of rat lung epithelial (RLE-6TN) cells in the cell culture medium containing either the wild-type or mutated secreted extracellular domain of the dog β<sub>1</sub> subunit was placed as drops on the lid of a 24-well dish and cultured for 4 hours after inverting the lid. Representative images of cell aggregates formed in the hanging drops are shown. Quantification was performed by determining the aggregate area in 11 hanging drops, each containing various number of cell aggregates, from four experiments for both wild-type and mutated Sec-dog β<sub>1</sub>. Each dot represents the mean aggregate area for an individual hanging drop. \**P*<0.01 significant difference from WT, Student's *t*-test.

was incubated with the media containing wild-type or mutated Sec-dog β<sub>1</sub>, followed by collecting the beads, elution and immunoblotting of the bead-adherent proteins. In addition to YFP-rat-β<sub>1</sub> and the endogenous dog β<sub>1</sub> subunit from MDCK cells, immunoblotting revealed the presence of Sec-dog β<sub>1</sub> among proteins eluted from the beads. The amount of the mutated Sec-dog β<sub>1</sub> co-precipitated with YFP-rat-β<sub>1</sub> was considerably greater than the amount of the YFP-rat-β<sub>1</sub>-co-precipitated wild-type Sec-dog β<sub>1</sub> (Fig. 7E).

To determine whether rat-like mutations in Sec-dog β<sub>1</sub> increase its interaction with the rat β<sub>1</sub> subunits present in the plasma membrane of live cells, the media containing either wild-type or mutated Sec-dog β<sub>1</sub> were added to the suspension of RLE-6TN, cultured epithelial cells of rat origin that endogenously express the β<sub>1</sub> subunit (Hao et al., 2003). If the adhesive interaction between rat β<sub>1</sub> subunits is mediated by the same amino acid region as binding between dog β<sub>1</sub> subunits, the secreted extracellular domain of the dog β<sub>1</sub> subunit with rat-like mutations in the region 198–207 is expected to reduce the aggregation of RLE-6TN cells with each other owing to competitive inhibition of intercellular β<sub>1</sub>-β<sub>1</sub> binding.

The ability of RLE-6TN cells to aggregate was assayed by measuring the area of cell aggregates formed in the cell suspension hanging drop. The results show that the area of cell aggregates formed in the presence of the wild-type Sec-dog β<sub>1</sub> was significantly greater than the area of cell aggregates formed in the presence of the mutated Sec-dog β<sub>1</sub> (Fig. 7F). The results suggest that the presence of a rat-like region on the Sec-dog β<sub>1</sub> enabled its interaction with the endogenous rat β<sub>1</sub> subunits exposed on the surface of RLE-6TN cells. This interaction, in turn, competitively inhibited the interaction between the β<sub>1</sub> subunits of adjacent cells and, hence, cell aggregation. Therefore, as with dog β<sub>1</sub> subunits, the interaction between two rat β<sub>1</sub> subunits is also mediated by amino acid sequences within the rat 198–208 amino acid region that convey species specificity.

## Discussion

Several lines of evidence support the notion of trans-dimerization occurring between the Na<sup>+</sup>/K<sup>+</sup>-ATPase β<sub>1</sub> subunits of neighboring epithelial cells. First, in mixed cell monolayers, the endogenous β<sub>1</sub> subunit of normal rat kidney epithelial cells co-immunoprecipitates with the YFP-linked rat β<sub>1</sub> subunit overexpressed in MDCK cells (Padilla-Benavides et al., 2010). Second, the results of fluorescence resonance energy transfer (FRET) show that the β<sub>1</sub> subunits of neighboring cells in a cell monolayer have sufficient proximity to permit direct interaction (Padilla-Benavides et al., 2010). Third, removal of Ca<sup>2+</sup> from the culture medium followed by disruption of intercellular junctions between MDCK cells expressing both YFP-β<sub>1</sub> and the endogenous β<sub>1</sub> subunits decreases the amount of YFP-β<sub>1</sub>-co-precipitated β<sub>1</sub> subunits (Tokhtaeva et al., 2011). Finally, increasing exposure of YFP-β<sub>1</sub> to endogenous β<sub>1</sub> subunits located in neighboring cells by mixing YFP-β<sub>1</sub>-expressing MDCK cells with non-transfected MDCK cells amplifies the amount of YFP-β<sub>1</sub>-co-precipitated endogenous β<sub>1</sub> subunits (Tokhtaeva et al., 2011).

Experiments in co-cultures of cells of different species showed that the Na<sup>+</sup>/K<sup>+</sup>-ATPase β<sub>1</sub> subunits were present at homotypic, but not at heterotypic, cell contacts, suggesting that the β<sub>1</sub> subunits interact with each other in a species-specific mode (Padilla-Benavides et al., 2010; Shoshani et al., 2005).

|                   |     |                                                                                    |     |
|-------------------|-----|------------------------------------------------------------------------------------|-----|
| Dog $\beta_1$     | 1   | MARGKAKEE-----GSWKKFIWNSEKKEFLGRITGGSWFKILLFYVIFYGCLAGIFIGTIQVMLLIISEFKPTYQDRVAPP  | 75  |
| Rat $\beta_1$     | 1   | MARGKAKEE-----GSWKKFIWNSEKKEFLGRITGGSWFKILLFYVIFYGCLAGIFIGTIQVMLLIISELKPITYQDRVAPP | 75  |
| Human $\beta_2$   | 1   | MVIQKEKKS CGQVVEENKEFVWNPRTHQFMGRITGSWAFILLFYLVFYGFLTAMFTLTMVWMLQTVSDHTPKYQDRLATP  | 80  |
| Human HK- $\beta$ | 1   | MAALQEKKT CGQRMEEFQRYCWNPDGTGMLGRITLSRWVWISLYYVAFYVVM TGLFALCLYVLMQTVDPYTPDYQDLRSP | 80  |
| Human $\beta_3$   | 1   | -MTKNEKKS LNQLAEWKLFIYNPITGEFLGRITAKSWGLILLFYLVFYGFLAALFSFTIMVWMLQTLNDEVPKYRDQIPSP | 79  |
|                   |     |                                                                                    |     |
| Dog $\beta_1$     | 76  | GLIQIPQI---QKTEISFRPNPKSYEEYVRNIVRFLKDYKDSAQKDEMI FEDCGMNPSEIKERGEFNNERGERKVCRFK   | 152 |
| Rat $\beta_1$     | 76  | GLIQIPQI---QKTEISFRPNPKSYEAYVNLNIRFLEKYKDSAQKDDMI FEDCGMNPSEPKERGEFNHERGERKVCRFK   | 152 |
| Human $\beta_2$   | 81  | GLMIRPKT---ENLIVIVNVSDTESWDQHVQKLNKLFEPYND SIQAQK--NDVCR--PGRYYE QPDNGVLNYPKRCQFN  | 153 |
| Human HK- $\beta$ | 81  | GVTLRPDQVYGEKGLIEVYNVSDNRTWADLTQTLHAFLAGYSPAAQEDS---INCT--SEQYFFQESFRAPNHTKFSCKFT  | 155 |
| Human $\beta_3$   | 80  | GLMVFPKPV--TALEYTFSRSDPTSYAGYIEDLKKFLKPYTLEEQKNI---TVCP--DGALFEQKGPVYV----ACQFP    | 147 |
|                   |     |                                                                                    |     |
| Dog $\beta_1$     | 153 | LEWLGNCSGIND-ETYGYRDGKPCVLIKLNRLVGFKPKPKNESLEAYPV-MKYSYPYVLPVQCTGKRD-EDKDRIGNVEY   | 229 |
| Rat $\beta_1$     | 153 | LDWLGNCSGIND-ESYGYKEGKPCIIKLNRLVGFKPKPKNESLEAYPLIMKYMENVLPVQCTGKRD-EDKDKVGNIEY     | 230 |
| Human $\beta_2$   | 154 | RIQLGNCSGIGDSTHYGYSIGQPCVFIKMNRIKRVINFYAGA-----NQSMNVTCAGKRD-EDAENLGNFVM           | 216 |
| Human HK- $\beta$ | 156 | ADMLQNC SGLAD-PNFGFEEGKPCFIIKMNRIKRVKFLPSN-----GSAPRVDCAFDQPRELQPLQVKY             | 218 |
| Human $\beta_3$   | 148 | ISLLQACSGMND-PDFGYSQGNPCILVKMNRRIIGLKPEG-----VPRIDCVSKNE----DIPNAV                 | 203 |
|                   |     |                                                                                    |     |
| Dog $\beta_1$     | 230 | FGLGGYPGFPLQYYPYKGLLQPKYLQPLLAVQ--FTNLIMDTEIRIECKAY-GENIGYSE-KDRFGGRFDVKIEVKS-     | 303 |
| Rat $\beta_1$     | 231 | FGMGGFYGFPLQYYPYKGLLQPKYLQPLLAVQ--FTNLITLDTIEIRIECKAY-GENIGYSE-KDRFGGRFDVKIEVKS-   | 304 |
| Human $\beta_2$   | 217 | FPANG--NIDLMYFPYKGFHVNVTQPLVAVK--FLNVTNVEVNVNVECRIN-AAANIATDDERDKFAGRVAFKLRINKT    | 290 |
| Human HK- $\beta$ | 219 | YPNG--TFSLHYFPYKGGKQPHYSNPLVAAK--LLNIPRNAEVAIVCKVM-AEHVTFNPNHPDYEGKVEFKLKIEK-      | 291 |
| Human $\beta_3$   | 204 | YPHNG--MIDLKFFPYKGLLHVGYLQPLVAVQVSPANNTIGKEVIVECKIDGSANLKSQDRDRKFLGRVMFKITARA-     | 279 |

**Fig. 8. Multiple alignment of various isoforms of the Na<sup>+</sup>/K<sup>+</sup>-ATPase  $\beta$  subunits and the H<sup>+</sup>/K<sup>+</sup>-ATPase  $\beta$  subunits.** A multiple alignment of various isoforms of the  $\beta$  subunits of these P<sub>2</sub>-type ATPases shows that the region important for  $\beta$ - $\beta$  binding is present only in the epithelia-specific  $\beta_1$  isoform.

Direct measurement of  $\beta_1$ - $\beta_1$  interactions by using co-immunoprecipitation showed that the interaction between two dog subunits was much greater than the interaction between dog and rat subunits (Tokhtaeva et al., 2011). As the number and positions of *N*-glycans are the same, whereas the amino acid sequence is different in dog and rat  $\beta_1$  subunits, these results show the importance of amino-acid-dependent interactions in trans-dimerization of the  $\beta_1$  subunits. The most variable region between dog and rat subunits containing amino acid residues 198–207 and 198–208, respectively, includes the known epitope for the monoclonal antibody against the Na<sup>+</sup>/K<sup>+</sup>-ATPase  $\beta_1$  subunit, clone M17-P5-F11 (Sun and Ball, 1994), which reacts with the dog, but not the rat,  $\beta_1$  subunit (Fig. 1). The same antibody inhibits cell–cell adhesion between surface-attached dog MDCK cells (Vagin et al., 2006), which suggests that the region 198–207 contributes to protein–protein interactions between the dog  $\beta_1$  subunits of neighboring cells.

Molecular modeling of dog and rat  $\beta_1$  subunits based on a high-resolution structure of the Na<sup>+</sup>/K<sup>+</sup>-ATPase (2ZXE) (Shinoda et al., 2009) showed that all the residues different in dog and rat in the 198–207 (198–208) region are exposed at the surface of the extracellular domain facing the apposed cell (Fig. 2B), further supporting the hypothesis regarding the involvement of this region in adhesive  $\beta_1$ - $\beta_1$  binding. Finally, the results of site-directed mutagenesis of the species-specific residues in this region in both rat and dog subunits confirmed the importance of this region for adhesive  $\beta_1$  dimerization. Particularly, rat-like mutations in the region 198–207 of the YFP-dog- $\beta_1$  impaired both  $\beta_1$  dimerization and antibody binding (Figs 3, 4). Conversely, dog-like mutations in the region 198–208 of the YFP-rat- $\beta_1$  improved  $\beta_1$ - $\beta_1$  binding and increased reactivity of the rat  $\beta_1$  with the adhesion-blocking antibody (Figs 5, 6). These results show the importance of this region for binding between dog  $\beta_1$  subunits. The same region is involved in the interaction of two rat  $\beta_1$  subunits as the rat-like mutations in the Sec-dog  $\beta_1$  increased interaction between Sec-dog  $\beta_1$  and rat  $\beta_1$  subunits and also resulted in inhibition of aggregation between rat epithelial cells (Fig. 7). Strikingly, the insertion of the

rat-unique Thr residue into YFP-dog- $\beta_1$  resulted in a complete loss of the M17-P5-F11 antibody recognition and in a dramatic decrease in YFP- $\beta_1$  binding to the dog subunit down to the level of  $\beta_1$ - $\beta_1$  interaction between dog and rat subunits (Figs 3, 4). Likewise, the removal of the Thr residue from the rat subunit resulted in a dramatic increase in binding to both dog  $\beta_1$  subunit and the dog-reactive antibody (Figs 5, 6). Therefore, the absence of the Thr residue in the regions spanning residues 198–207 is essential for binding between dog  $\beta_1$  subunits. By contrast, two rat  $\beta_1$  subunits effectively interact with each other (Padilla-Benavides et al., 2010), and their regions spanning 198–208 both containing the Thr residue are important for this interaction (Fig. 7). These results indicate that the amino acid residues crucial for  $\beta_1$ - $\beta_1$  binding are located both upstream and downstream of the Thr insertion position. The insertion or removal of the Thr residues in one of the two interacting subunits is likely to misalign these binding residues.

To conclude, the results presented here confirm that the Na<sup>+</sup>/K<sup>+</sup>-ATPase acts as a cell adhesion molecule by binding to the Na<sup>+</sup>/K<sup>+</sup>-ATPase molecule of a neighboring cell by means of trans-dimerization of their  $\beta_1$  subunits and also identify the amino acid region crucial for this dimerization. Remarkably, the region 198–207 (198–208) is present only in the  $\beta_1$  subunit, which is the major isoform of epithelial cells, but not in the other isoforms of the Na<sup>+</sup>/K<sup>+</sup>-ATPase and the homologous H,K-ATPase (Fig. 8). It is possible that, during evolution, this region was conserved in the  $\beta_1$  subunits to maintain a nonconventional role of the Na<sup>+</sup>/K<sup>+</sup>-ATPase in the formation and maintenance of epithelial junctions.

## Materials and Methods

### Construction of MDCK stable cell lines

The Na<sup>+</sup>/K<sup>+</sup>-ATPase rat  $\beta_1$  and dog  $\beta_1$  subunits linked through their N-termini to YFP were constructed as described previously (Tokhtaeva et al., 2009; Vagin et al., 2006). Mutants of rat and YFP-dog- $\beta_1$  were constructed by site-directed mutagenesis using the QuikChange mutagenesis kit (Agilent Technologies, Santa Clara, CA). The mutagenic primers were constructed using PrimerSelect software, 5.03 (supplementary material Table S1). Stable MDCK cell lines expressing wild-type and mutated YFP- $\beta_1$  were obtained as described previously (Vagin et al., 2005).

### Production of the wild-type and mutated secreted extracellular domains of the dog $\beta_1$ subunit

The vector encoding a secreted extracellular domain of the dog  $\beta_1$  subunit (Sec-dog  $\beta_1$ ) (Padilla-Benavides et al., 2010) constructed in the Fambrough laboratory was a generous gift from Liora Shoshani. This vector encodes a chimera containing 29 N-terminal amino acid residues of DPPIV and amino acid residues 64–303 of the dog Na<sup>+</sup>/K<sup>+</sup>-ATPase  $\beta_1$  subunit. The mutant of Sec-dog  $\beta_1$  was constructed by site-directed mutagenesis using the QuikChange mutagenesis kit (Agilent Technologies) with mutagenic primers (for list, see supplementary material Table S1). HEK-293 cells (ATCC, Manassas, VA) were transiently transfected with vectors encoding either the wild-type or mutated Sec-dog  $\beta_1$  using Lipofectamine-2000 transfection reagent (Invitrogen, Carlsbad, CA). The medium was changed 6 hours after transfection, and the media containing Sec-dog  $\beta_1$  were collected 48 hours later.

### Cell culture

Cells were grown in DMEM medium (Cellgro Mediatech, Manassas, VA) containing 4.5 g l<sup>-1</sup> glucose, 2 mM L-glutamine, 8 mg l<sup>-1</sup> phenol red, 100 units ml<sup>-1</sup> penicillin, 0.1 mg ml<sup>-1</sup> streptomycin and 10% FBS, unless specified otherwise.

### Confocal microscopy

Confocal microscopy images were acquired using a Zeiss LSM 510 laser scanning confocal microscope (Carl Zeiss MicroImaging GmbH, Germany) and LSM 510 software, version 3.2.

### Primary antibodies

A polyclonal antibody against GFP, which recognizes YFP (Clontech, Mountain View, CA), was used for immunoprecipitation. The following monoclonal antibodies were used for western blot analysis: against GFP, clones 7.1 and 13.1, which also recognize YFP (Roche Diagnostics, Indianapolis, IN), against the Na<sup>+</sup>/K<sup>+</sup>-ATPase  $\beta_1$  subunit, clone C464.6 (Millipore, MA), against the Na<sup>+</sup>/K<sup>+</sup>-ATPase  $\beta_1$  subunit, clone M17-P5-F11 (Affinity Bioreagents, Golden, CO), against the Na<sup>+</sup>/K<sup>+</sup>-ATPase  $\beta_1$  subunit, clone 464.8 (Novus Biologicals, Littleton, CO) and against  $\beta_1$ -integrin (BD Transduction Laboratories, San Jose, CA).

### Immunoprecipitation

Confluent MDCK cell monolayers were rinsed twice with ice-cold PBS and lysed by incubation with 200  $\mu$ l per well of 150 mM NaCl in 50 mM Tris pH 7.5 containing 1% Nonidet P40, 0.5% sodium deoxycholate and Complete Protease Inhibitor Cocktail, 1 tablet per 50 ml (Roche Diagnostics, Indianapolis, IN) at 4°C for 30 minutes, followed by scraping of the cells. Cell extracts were clarified by centrifugation (15,000 g, 10 minutes) at 4°C. Next, the cell extracts (400  $\mu$ g protein) were incubated with 30  $\mu$ l of the suspension of protein A in agarose (Roche Diagnostics, Mountain View, CA) in a total volume of 1 ml of the lysis buffer at 4°C with continuous rotation for at least 3 hours (or overnight) to remove the components that nonspecifically bind to protein A. The pre-cleared cell extract was mixed with 2  $\mu$ l of polyclonal antibodies against GFP or YFP (Clontech) and incubated with continuous rotation at 4°C for 60 minutes. After addition of 30  $\mu$ l of the suspension of protein A in agarose, the mixture was incubated at 4°C with continuous rotation overnight. The bead-adherent complexes were washed on the beads first with the lysis buffer and then with 500 mM NaCl in 50 mM Tris pH 7.5 containing 0.1% Nonidet P40 and 0.05% sodium deoxycholate and finally with 10 mM Tris pH 7.5 containing 0.1% Nonidet P40 and 0.05% sodium deoxycholate. The adherent proteins were eluted from the beads by incubation in 45  $\mu$ l of 2 $\times$  SDS-PAGE sample buffer (4% SDS, 0.05% Bromophenol Blue, 20% glycerol, 1%  $\beta$ -mercaptoethanol in 0.1 M Tris, pH 6.8) for 5 minutes at 80°C.

To enable quantitative comparison of immunoprecipitated YFP-linked and endogenous  $\beta_1$  subunits, the bead-adherent proteins were deglycosylated by incubation with 30  $\mu$ l of 50 mM sodium phosphate, pH 7.5 containing 0.16% SDS, 13 mM DTT, 1% Nonidet P40 and 1  $\mu$ l PNGase F from *Flavobacterium meningosepticum* (New England BioLabs, Ipswich, MA) for 1 hour at 37°C. After finishing the incubation, the reaction mixture was separated from the beads. The adherent proteins were eluted from the beads by incubation in 30  $\mu$ l of 2 $\times$  SDS-PAGE sample buffer for 5 minutes at 80°C. Proteins eluted from the beads were combined with the reaction mixture, separated by SDS-PAGE and analyzed by western blot to detect immunoprecipitated and co-immunoprecipitated proteins by using monoclonal antibodies against GFP (YFP), the Na<sup>+</sup>/K<sup>+</sup>-ATPase  $\beta_1$  subunit and the Na<sup>+</sup>/K<sup>+</sup>-ATPase  $\beta_1$  subunit.

### In vitro binding assay to determine the interaction between Sec-dog $\beta_1$ and YFP-rat- $\beta_1$

YFP-rat- $\beta_1$  stably expressed in MDCK cells was immunoprecipitated and washed from contaminating proteins as described above. Then, the beads with adherent YFP-rat- $\beta_1$  were incubated with 1 ml of cell culture media produced by HEK-293 cells transiently expressing either the wild-type or mutated Sec-dog  $\beta_1$  at 4°C, with continuous rotation for at least 3 hours (or overnight). The bead-adherent complexes were washed on the beads and eluted from the beads as described

above for the immunoprecipitation procedure. The eluted proteins were separated by SDS-PAGE and analyzed by western blot.

### Isolation of basolateral plasma membrane proteins of MDCK cells using surface-specific biotinylation

Cells were maintained for 6 days after becoming confluent in transwell inserts. Biotinylation of surface proteins was performed according to previously described procedures (Gottardi et al., 1995; Kroepfl and Gardinier, 2001). Cell monolayers were biotinylated with EZ-Link Sulfo-NHS-SS-biotin (Pierce) that was added into the well only (basolateral surface of the tight cell monolayers). After quenching the biotinylation reaction, cells were washed and then lysed by incubation with 200  $\mu$ l of 0.15 M NaCl in 15 mM Tris pH 8.0 with 1% Triton X-100 and 4 mM EGTA. Cell extracts were clarified by centrifugation (15,000 g, 10 minutes) at 4°C. To isolate surface-biotinylated proteins, the cell extract was incubated with 100  $\mu$ l of streptavidin-agarose beads (Sigma-Aldrich) in a total volume of 1 ml of 0.15 M NaCl in 15 mM Tris pH 8.0 with 0.5% Triton X-100 and 4 mM EGTA at 4°C with continuous rotation for 60 minutes. The bead-adherent complexes were washed three times on the beads, and then proteins were eluted from the beads by incubation in 40  $\mu$ l of SDS-PAGE sample buffer for 5 minutes at 80°C.

### Western blot analysis of the total, basolateral and immunoprecipitated proteins of MDCK cells

MDCK cell extracts containing 1–10  $\mu$ g protein mixed with an equal volume of SDS-PAGE sample buffer or 5–20  $\mu$ l of proteins eluted from streptavidin-agarose beads or protein-A-conjugated agarose beads were loaded onto 4–12% gradient SDS-PAGE gels (Invitrogen). Where indicated, proteins were treated by PNGase F from *Flavobacterium meningosepticum* (New England BioLabs) according to the manufacturer's instructions prior to loading for SDS-PAGE. Proteins were separated by SDS-PAGE using MES in SDS running buffer (0.05 M MES, 0.05 M Tris base, 0.1% SDS and 1 mM EDTA, pH 7.3), transferred onto a nitrocellulose membrane (BioRad, Hercules, CA, USA) and detected by western blot analysis using the appropriate primary antibody and anti-mouse or anti-rabbit secondary antibody conjugated to alkaline phosphatase (Promega, Madison, WI) or horseradish peroxidase (American Qualex, San Clemente, CA). Alkaline phosphatase was detected using Nitro Blue Tetrazolium and 5-bromo-4-chloro-3-indolyl-phosphate in alkaline phosphatase buffer (150 mM NaCl, 1 mM MgCl<sub>2</sub> in 10 mM Tris-HCl, pH 9.0). Horseradish peroxidase was detected by using Super Signal West Pico Chemiluminescent Substrate (Thermo Scientific, Rockford, IL). Immunoblots were quantified by densitometry using Zeiss LSM 510 software, version 3.2.

### Cell aggregation assay

Cell aggregation was assessed by a hanging drop assay performed in a manner similar to a previously described procedure (Qin et al., 2005). RLE-6TN cells (ATCC, Manassas) grown in 10 cm plates were harvested using 0.25% trypsin and 2.21 mM EDTA in HBSS (Cellgro) diluted 1:100 in PBS containing 2 mM EDTA, pH 8, washed twice in PBS and resuspended at 2.5 $\times$ 10<sup>6</sup> cells ml<sup>-1</sup> in normal growth medium. The cell suspension containing 2 $\times$ 10<sup>4</sup> cells was then diluted five times by the cell culture media containing the wild-type or mutated Sec-dog  $\beta_1$  and placed as 40  $\mu$ l drops on the lid of a 24-well culture dish. The lid was inverted over cell culture wells, which contained PBS to avoid evaporation of hanging drops, and the cells were allowed to aggregate for 4 hours in a tissue culture incubator. Next, the cell aggregates in each drop were subjected to shear force by passage ten times through a 200- $\mu$ l wide-bore pipette tip to disperse loosely associated cells and photographed using a Nikon Eclipse TE200 inverted microscope (Nikon Metrology, Brighton, MI) using a  $\times$ 10 phase-contrast objective. Aggregates were traced, and the aggregate area was measured using MetaMorph software.

### Statistical analysis

Statistical analysis was performed by using Student's *t* tests (GraphPad Prism 4 software and Microsoft Excel). Statistical significance and the number of experiments are specified in the figure legends.

### Acknowledgements

We are grateful to Liora Shoshani for providing an expression vector for the secreted extracellular domain of the dog  $\beta_1$  subunit. We thank Glenn Nagami for careful reading of the manuscript and helpful suggestions.

### Funding

The work was supported by the National Institutes of Health [grant numbers DK077149 to O.V., DK058333 to G.S. and R37-HL48129 to J.I.S.]. Deposited in PMC for release after 12 months.

Supplementary material available online at

<http://jcs.biologists.org/lookup/suppl/doi:10.1242/jcs.100149/-/DC1>



## References

- Baum, B. and Georgiou, M.** (2011). Dynamics of adherens junctions in epithelial establishment, maintenance, and remodeling. *J. Cell Biol.* **192**, 907-917.
- Bendtsen, J. D., Nielsen, H., von Heijne, G. and Brunak, S.** (2004). Improved prediction of signal peptides: SignalP 3.0. *J. Mol. Biol.* **340**, 783-795.
- Gottardi, C. J., Dunbar, L. A. and Caplan, M. J.** (1995). Biotinylation and assessment of membrane polarity: caveats and methodological concerns. *Am. J. Physiol.* **268**, F285-F295.
- Gumbiner, B. M.** (2005). Regulation of cadherin-mediated adhesion in morphogenesis. *Nat. Rev. Mol. Cell Biol.* **6**, 622-634.
- Hamrick, M., Renaud, K. J. and Fambrough, D. M.** (1993). Assembly of the extracellular domain of the Na<sup>+</sup>/K<sup>+</sup>-ATPase beta subunit with the alpha subunit. Analysis of beta subunit chimeras and carboxyl-terminal deletions. *J. Biol. Chem.* **268**, 24367-24373.
- Hao, H., Wendt, C. H., Sandhu, G. and Ingbar, D. H.** (2003). Dexamethasone stimulates transcription of the Na<sup>+</sup>-K<sup>+</sup>-ATPase beta1 gene in adult rat lung epithelial cells. *Am. J. Physiol. Lung. Cell Mol. Physiol.* **285**, L593-L601.
- Hartsock, A. and Nelson, W. J.** (2008). Adherens and tight junctions: structure, function and connections to the actin cytoskeleton. *Biochim. Biophys. Acta* **1778**, 660-669.
- Irie, K., Shimizu, K., Sakisaka, T., Ikeda, W. and Takai, Y.** (2004). Roles and modes of action of nectins in cell-cell adhesion. *Semin. Cell Dev. Biol.* **15**, 643-656.
- Kizhatil, K., Davis, J. Q., Davis, L., Hoffman, J., Hogan, B. L. and Bennett, V.** (2007). Ankyrin-G is a molecular partner of E-cadherin in epithelial cells and early embryos. *J. Biol. Chem.* **282**, 26552-26561.
- Kroepfl, J. F. and Gardinier, M. V.** (2001). Identification of a basolateral membrane targeting signal within the cytoplasmic domain of myelin/oligodendrocyte glycoprotein. *J. Neurochem.* **77**, 1301-1309.
- Miyoshi, J. and Takai, Y.** (2005). Molecular perspective on tight-junction assembly and epithelial polarity. *Adv. Drug. Deliv. Rev.* **57**, 815-855.
- Miyoshi, J. and Takai, Y.** (2007). Nectin and nectin-like molecules: biology and pathology. *Am. J. Nephrol.* **27**, 590-604.
- Nelson, W. J. and Veshnock, P. J.** (1987). Ankyrin binding to (Na<sup>+</sup>+K<sup>+</sup>)ATPase and implications for the organization of membrane domains in polarized cells. *Nature* **328**, 533-536.
- Nelson, W. J., Shore, E. M., Wang, A. Z. and Hammerton, R. W.** (1990). Identification of a membrane-cytoskeletal complex containing the cell adhesion molecule uvomorulin (E-cadherin), ankyrin, and fodrin in Madin-Darby canine kidney epithelial cells. *J. Cell Biol.* **110**, 349-357.
- Padilla-Benavides, T., Roldan, M. L., Larre, I., Flores-Benitez, D., Villegas-Sepulveda, N., Contreras, R. G., Cerejido, M. and Shoshani, L.** (2010). The polarized distribution of Na<sup>+</sup>/K<sup>+</sup>-ATPase: role of the interaction between {beta} subunits. *Mol. Biol. Cell* **21**, 2217-2225.
- Qin, Y., Capaldo, C., Gumbiner, B. M. and Macara, I. G.** (2005). The mammalian Scribble polarity protein regulates epithelial cell adhesion and migration through E-cadherin. *J. Cell Biol.* **171**, 1061-1071.
- Sakisaka, T., Ikeda, W., Ogita, H., Fujita, N. and Takai, Y.** (2007). The roles of nectins in cell adhesions: cooperation with other cell adhesion molecules and growth factor receptors. *Curr. Opin. Cell Biol.* **19**, 593-602.
- Shapiro, L. and Weis, W. I.** (2009). Structure and biochemistry of cadherins and catenins. *Cold Spring Harb. Perspect. Biol.* **1**, a003053.
- Shinoda, T., Ogawa, H., Cornelius, F. and Toyoshima, C.** (2009). Crystal structure of the sodium-potassium pump at 2.4 Å resolution. *Nature* **459**, 446-450.
- Shoshani, L., Contreras, R. G., Roldan, M. L., Moreno, J., Lazaro, A., Balda, M. S., Matter, K. and Cerejido, M.** (2005). The polarized expression of Na<sup>+</sup>/K<sup>+</sup>-ATPase in epithelia depends on the association between beta-subunits located in neighboring cells. *Mol. Biol. Cell* **16**, 1071-1081.
- Steed, E., Balda, M. S. and Matter, K.** (2010). Dynamics and functions of tight junctions. *Trends Cell Biol.* **20**, 142-149.
- Sun, Y. and Ball, W. J., Jr** (1994). Identification of antigenic sites on the Na<sup>+</sup>/K<sup>+</sup>-ATPase beta-subunit: their sequences and the effects of thiol reduction upon their structure. *Biochim. Biophys. Acta* **1207**, 236-248.
- Takai, Y., Irie, K., Shimizu, K., Sakisaka, T. and Ikeda, W.** (2003). Nectins and nectin-like molecules: roles in cell adhesion, migration, and polarization. *Cancer Sci.* **94**, 655-667.
- Tokhtaeva, E., Sachs, G. and Vagin, O.** (2009). Assembly with the Na<sup>+</sup>/K<sup>+</sup>-ATPase alpha(1) subunit is required for export of beta(1) and beta(2) subunits from the endoplasmic reticulum. *Biochemistry* **48**, 11421-11431.
- Tokhtaeva, E., Sachs, G., Souda, P., Bassilian, S., Whitelegge, J. P., Shoshani, L. and Vagin, O.** (2011). Epithelial junctions depend on intercellular trans-interactions between the Na<sup>+</sup>/K<sup>+</sup>-ATPase {beta}1 subunits. *J. Biol. Chem.* **286**, 25801-25812.
- Vagin, O., Turdikulova, S. and Sachs, G.** (2005). Recombinant addition of N-glycosylation sites to the basolateral Na<sup>+</sup>/K<sup>+</sup>-ATPase beta1 subunit results in its clustering in caveolae and apical sorting in HGT-1 cells. *J. Biol. Chem.* **280**, 43159-43167.
- Vagin, O., Tokhtaeva, E. and Sachs, G.** (2006). The role of the beta1 subunit of the Na<sup>+</sup>/K<sup>+</sup>-ATPase and its glycosylation in cell-cell adhesion. *J. Biol. Chem.* **281**, 39573-39587.
- Vagin, O., Tokhtaeva, E., Yakubov, I., Shevchenko, E. and Sachs, G.** (2008). Inverse correlation between the extent of N-glycan branching and intercellular adhesion in epithelia. Contribution of the Na<sup>+</sup>/K<sup>+</sup>-ATPase beta1 subunit. *J. Biol. Chem.* **283**, 2192-2202.
- Wu, Y., Jin, X., Harrison, O., Shapiro, L., Honig, B. H. and Ben-Shaul, A.** (2010). Cooperativity between trans and cis interactions in cadherin-mediated junction formation. *Proc. Natl. Acad. Sci. USA* **107**, 17592-17597.
